# Supplementary material
Source: publisher figshare collection journal article supplement (https://acs.figshare.com/ndownloader/files/7999882)
Supplement: Supplementary file 1 [file 7999882]

# Supporting information for: Stratification dynamics in drying colloidal mixtures

Michael P. Howard,<sup>†</sup> Arash Nikoubashman,<sup>‡</sup> and Athanassios Z.  
Panagiotopoulos<sup>\*,†</sup>

*Department of Chemical and Biological Engineering, Princeton University, Princeton, New  
Jersey 08544, United States of America, and Institute of Physics, Johannes Gutenberg  
University Mainz, Staudingerweg 7, 55128 Mainz, Germany*

E-mail: [azp@princeton.edu](mailto:azp@princeton.edu)

Number density profiles during drying for  $d_B = 6 d_S$  (Figure S1),  $4 d_S$  (Figure S2), and  
 $2 d_S$  (Figure S3) at  $v = 0.02 d_S/\tau$ .

---

\*To whom correspondence should be addressed

<sup>†</sup>Princeton University

<sup>‡</sup>Johannes Gutenberg University Mainz

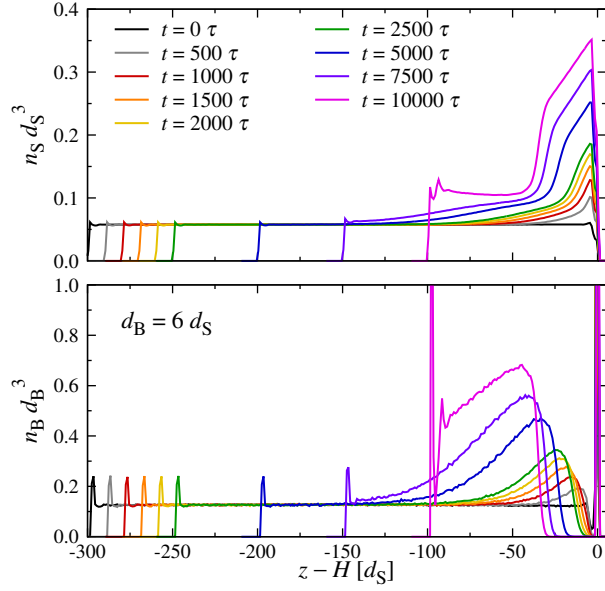

Figure S1: Number density profiles during drying for  $d_B = 6 d_S$  and  $v = 0.02 d_S/\tau$ .

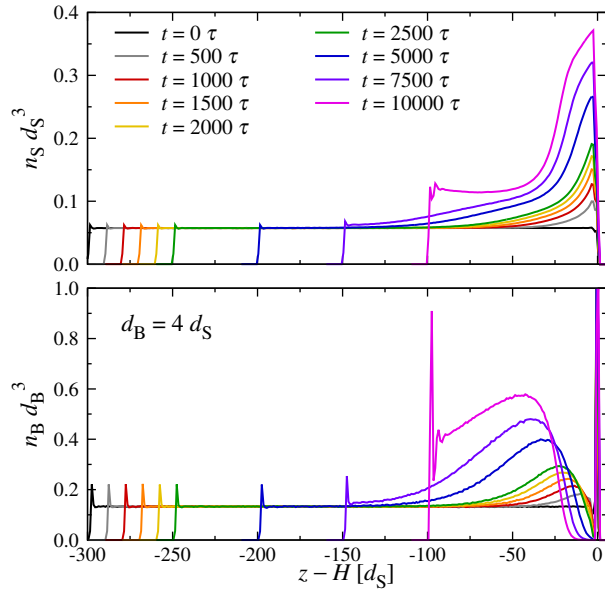

Figure S2: Number density profiles during drying for  $d_B = 4 d_S$  and  $v = 0.02 d_S/\tau$ .

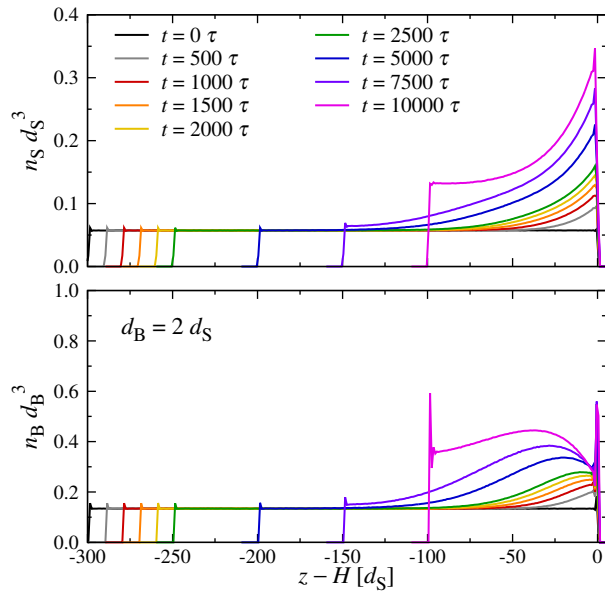

Figure S3: Number density profiles during drying for  $d_B = 2 d_S$  and  $v = 0.02 d_S/\tau$ .
